# Supplementary material
Source: publisher site journal article supplement (https://www.dovepress.com/article/552719)
Supplement: Supplementary file 1 [file revision-552719%20Supplementary%20Materials_1.docx]

A. B. C.


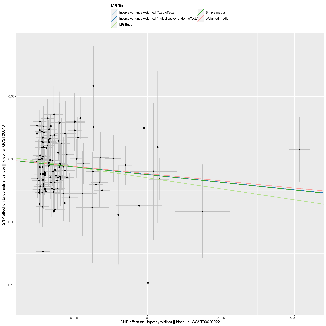

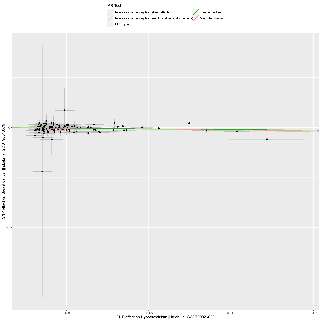

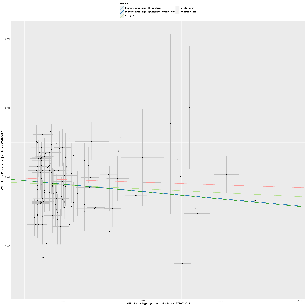


Figure S1. Scatter plot of the MR study.

(A). Scatter plot of the MR estimates for the association of hypothyroidism on the risk of endometrial cancer; (B). Scatter plot of the MR estimates for the association of hypothyroidism on the risk of breast cancer (ebi-a-GCST90018579); (C). Scatter plot of the MR estimates for the association of hypothyroidism on the risk of breast cancer (ebi-a-GCST004988).

A. B. C.


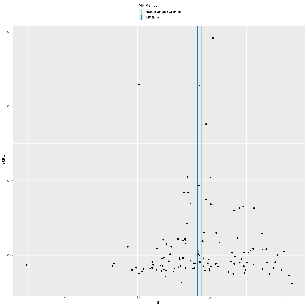

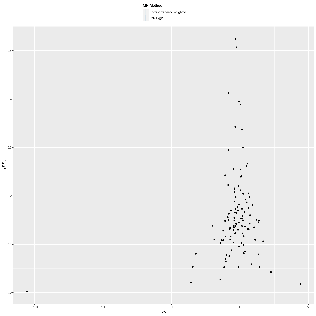

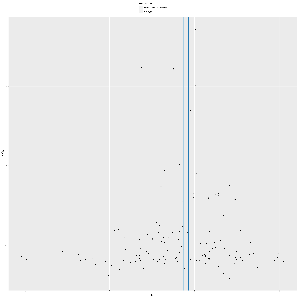


Figure S2. Funnel plot reveals overall heterogeneity of the MR study.

(A). Funnel plot of the MR estimates for the association of hypothyroidism on the risk of endometrial cancer; (B). Funnel plot of the MR estimates for the association of hypothyroidism on the risk of breast cancer (ebi-a-GCST90018579); (C). Funnel plot of the MR estimates for the association of hypothyroidism on the risk of breast cancer (ebi-a-GCST004988).

A. B. C.


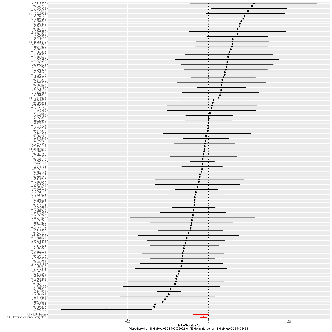

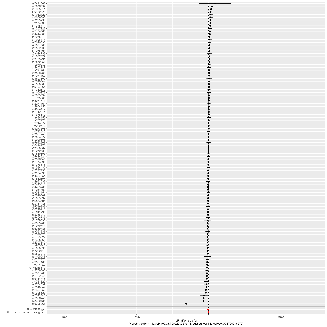

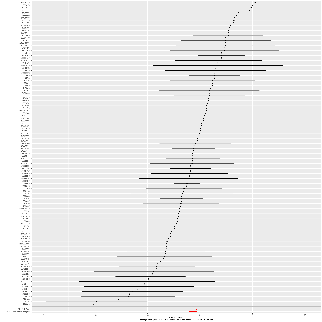


Figure S3. Forest plot of the impact of the MR study.

(A). Forest plot of the MR estimates for the association of hypothyroidism on the risk of endometrial cancer; (B). Forest plot of the MR estimates for the association of hypothyroidism on the risk of breast cancer (ebi-a-GCST90018579); (C). Forest plot of the MR estimates for the association of hypothyroidism on the risk of breast cancer (ebi-a-GCST004988).

A. B. C.


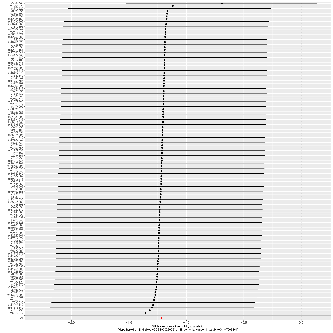

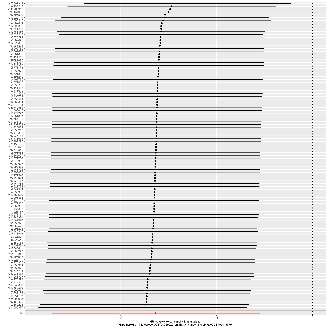

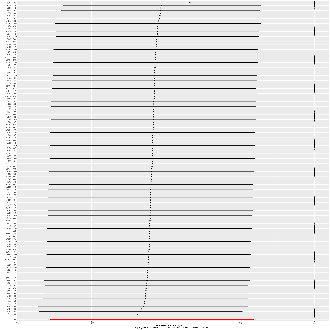


Figure S4. Leave-one-out analysis of the impact of the MR study.

(A). Leave-one-out analysis of the MR estimates for the association of hypothyroidism on the risk of endometrial cancer; (B). Leave-one-out analysis of the MR estimates for the association of hypothyroidism on the risk of breast cancer (ebi-a-GCST90018579); (C). Leave-one-out analysis of the MR estimates for the association of hypothyroidism on the risk of breast cancer (ebi-a-GCST004988).
